# Supplementary material for: Defective h-BN sheet embedded atomic metals as highly active and selective electrocatalysts for NH3 fabrication via NO reduction
Source: Royal Society of Chemistry journal article supplement (doi:10.1039/d0cp03559a), 2020-01-01
Supplement: d0cp03559a1.pdf [file d0cp03559a1.pdf]

**Electronic Supplementary Information**

**Defective h-BN Sheet Embedded Atomic Metals as Highly  
Active and Selective Electrocatalysts for NH<sub>3</sub> Fabrication via  
NO Reduction**

Peng-Fei Sun,<sup>a</sup> Wen-Liang Wang,<sup>a</sup> Xiang Zhao,<sup>\*b</sup> and Jing-Shuang Dang<sup>\*a</sup>

a. Key Laboratory for Macromolecular Science of Shaanxi Province, School of Chemistry and Chemical Engineer-ing, Shaanxi Normal University, Xi'an 710119 (China)

b. Department of Chemistry, School of Science, Xi'an Jiaotong University, Xi'an 710049 (China)

**Table S1.** The binding energy of Mo atom on defective h-BN with B-vacancy and the adsorption energy of NO on Mo-embedded h-BN. The unit is eV.

|                      | 4*4 supercell | 5*5 supercell | 6*6 supercell |
|----------------------|---------------|---------------|---------------|
| $E_b$                | -9.74         | -9.71         | -9.75         |
| $E_{ads(NO,end-on)}$ | -3.09         | -3.12         | -3.13         |

**Table S2.** Charge transfer between TM atoms and the defective h-BN sheet by Bader charge analysis.

|                  | Ti   | V    | Cr   | Mn   | Fe   | Co   | Ni   | Cu   | Mo   |
|------------------|------|------|------|------|------|------|------|------|------|
| $\Delta Q (e^-)$ | 1.33 | 1.30 | 1.27 | 1.25 | 1.04 | 0.91 | 0.89 | 0.92 | 1.22 |

**Table S3.** Bond lengths in units of Å and adsorption energies for NO on TMs @h-BN in units of eV.

|    | Side-on adsorption |       |       |           | End-on adsorption |       |           |
|----|--------------------|-------|-------|-----------|-------------------|-------|-----------|
|    | N-O                | N- TM | O- TM | $E_{ads}$ | N- O              | N- TM | $E_{ads}$ |
| Ti | 1.27               | 2.17  | 2.08  | -2.34     | 1.21              | 1.98  | -2.67     |
| V  | 1.30               | 1.92  | 1.91  | -3.11     | 1.21              | 1.78  | -3.05     |
| Cr | 1.28               | 1.88  | 1.94  | -1.64     | 1.21              | 1.74  | -2.08     |
| Mn | -                  | -     | -     | -         | 1.20              | 1.71  | -2.63     |
| Fe | 1.24               | 1.81  | 2.09  | -1.89     | 1.19              | 1.69  | -2.50     |
| Co | -                  | -     | -     | -         | 1.19              | 1.71  | -1.87     |
| Ni | -                  | -     | -     | -         | 1.19              | 1.72  | -1.67     |
| Cu | -                  | -     | -     | -         | 1.18              | 1.75  | -1.17     |
| Mo | 1.35               | 1.89  | 1.97  | -3.49     | 1.21              | 1.83  | -3.09     |

**Table S4.** Atom charge of NO gas molecule and adsorbates on the Cu doped defective h-BN sheet based on Bader charge analysis.

|   | NO    | *NO   | *HNO  | *NOH  |
|---|-------|-------|-------|-------|
| N | 0.45  | 0.23  | -0.14 | -0.13 |
| O | -0.45 | -0.38 | -0.40 | -0.71 |

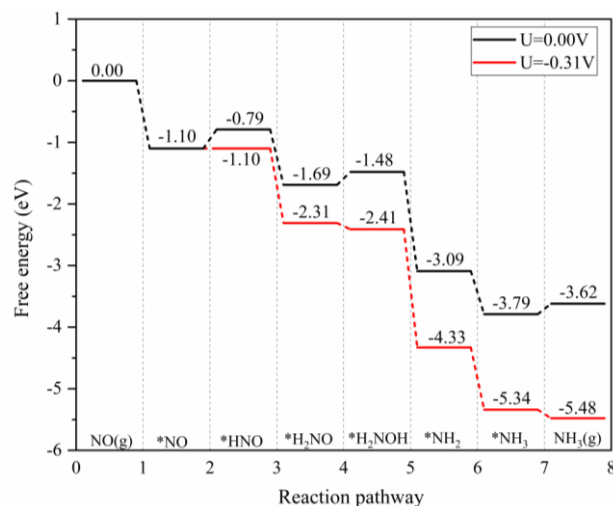

**Figure S1.** Free-energy diagram for the NOER on Ni@h-BN at low coverage along the most energetically favorable (Path II) pathway.

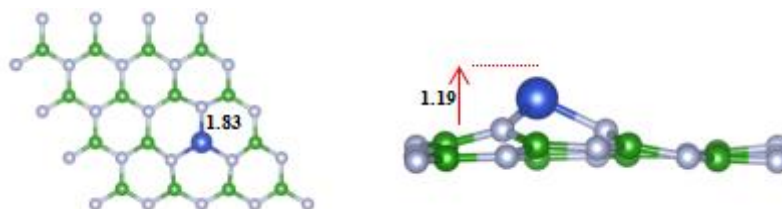

**Figure S2.** Optimized structure of Cu-embedded h-BN sheet. The unit of bond length is Å.

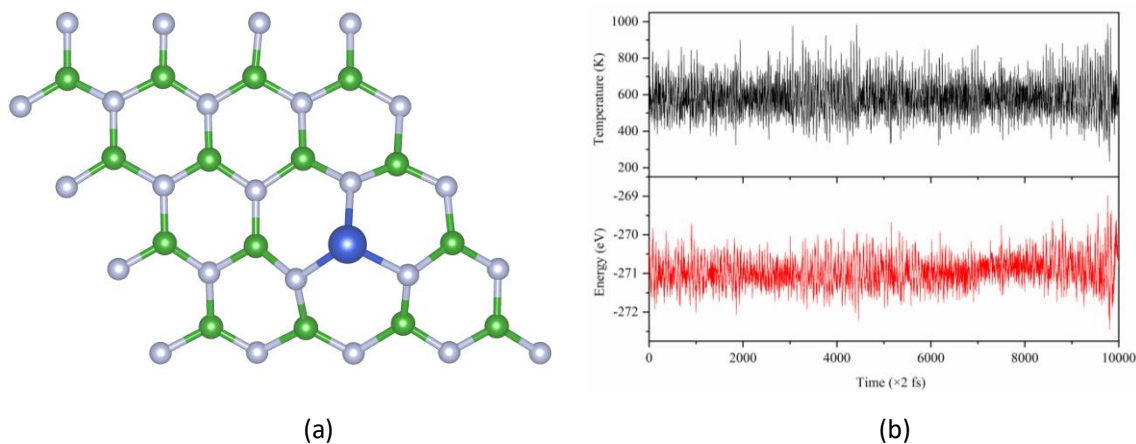

**Figure S3.** (a) Geometry snapshot (b) Variation of temperature and total energy of single Cu atom decorated defective h-BN during AIMD simulation. The simulation was running under 600 K for 20 ps with a time step of 2 fs. Green, white and blue balls represent B, N, and Cu atoms, respectively

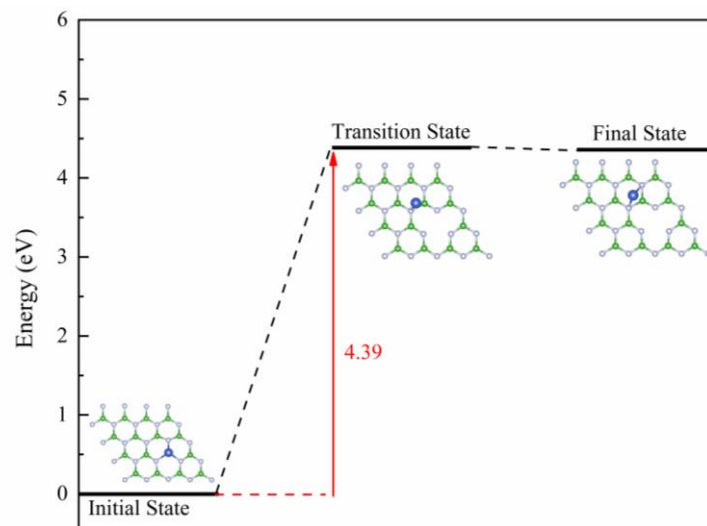

**Figure S4.** The minimum energy path (MEP) for the diffusion of the embedded Cu atom from the defect B vacancy to a neighboring hollow site.

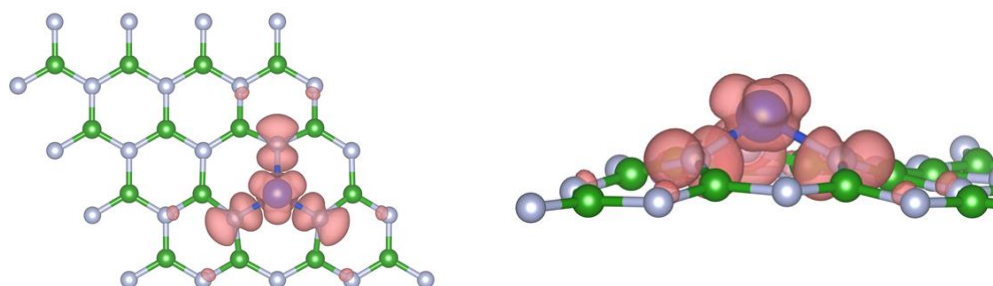

**Figure S5.** spin-polarized density for Cu-embedded h-BN sheet in the 3D isosurface version with a value of 0.00623 electrons  $\text{\AA}^{-3}$ .

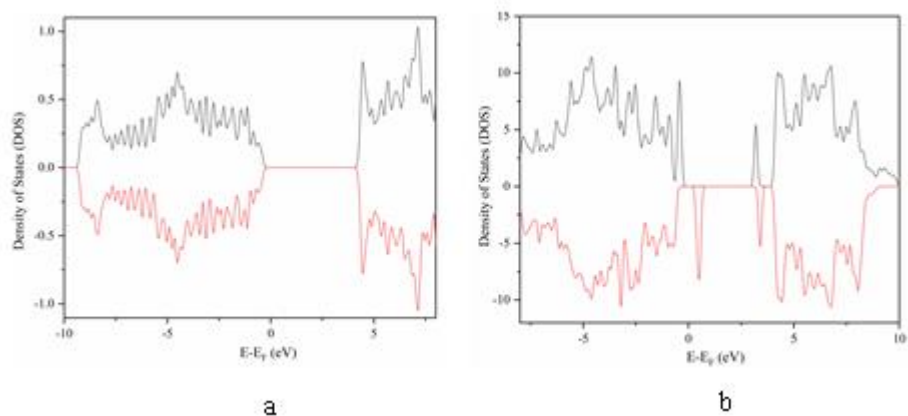

**Figure S6.** Density of states profiles of (a) perfect h-BN and (b) Cu-doped h-BN sheet with B-vacancy. The Fermi level was shifted to zero.

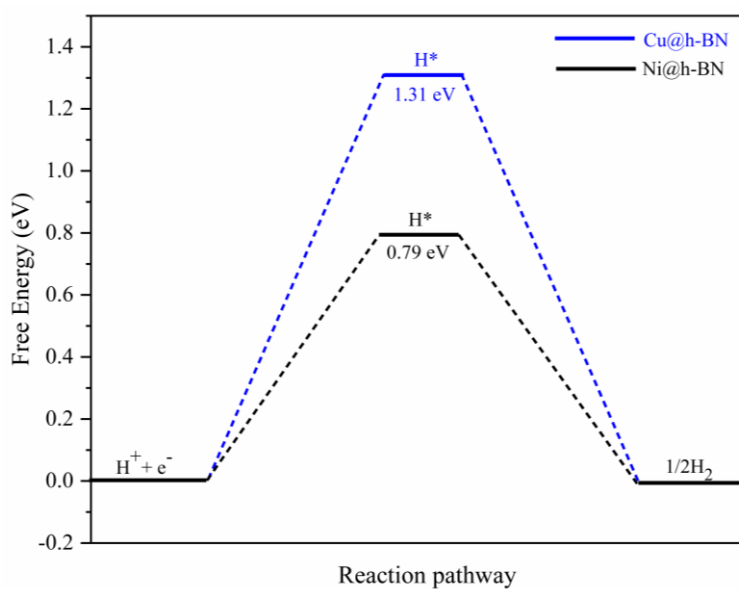

**Figure S7.** Gibbs free energy diagram of Cu@h-BN and Ni@h-BN for HER.
